# Supplementary material
Source: Springer Nature journal article supplement (https://www.springermedizin.de/resource/supplementary/12931_2013_1507_MOESM1_ESM.pdf/9426356)

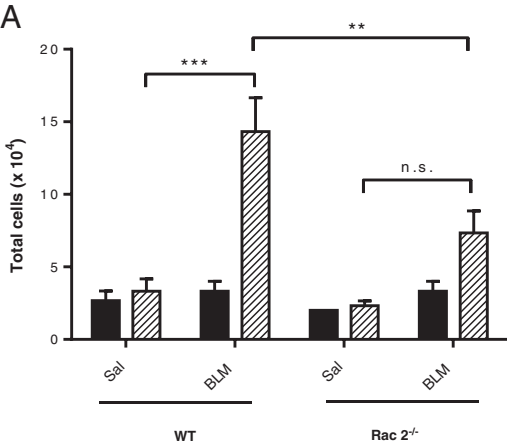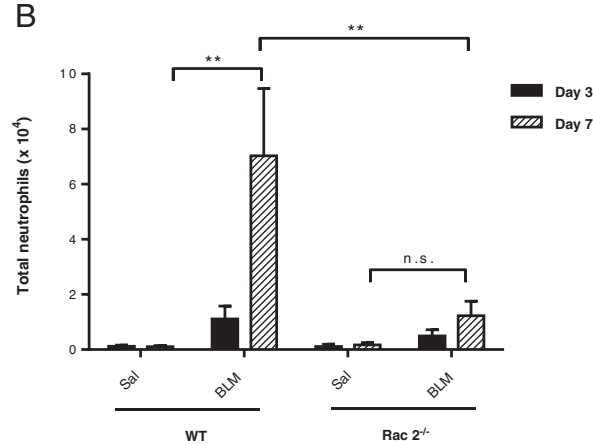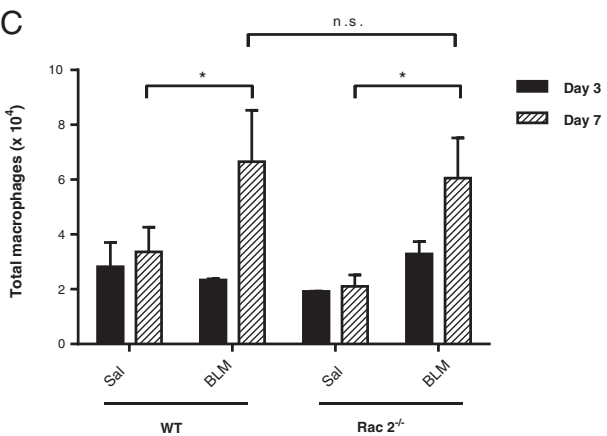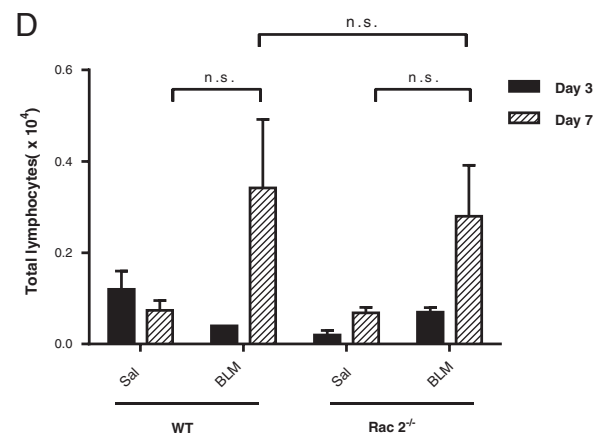

Supplement: MOESM1 [file 9426356]
